# Supplementary material
Source: PubMed Central journal article supplement (PMC2879790)
Supplement: pp.110.156554_1.pdf [file pp.110.156554_1.pdf]

**Supplemental Figure 1.** Protein sequences encoded by the predicted AGP genes. Colored sequences at the N and C terminus indicate predicted signal peptide (green) and GPI anchor (blue) addition sequences if present. AP, PA, SP, and TP repeats (yellow) and lysine-rich regions (olive) are also indicated.

>At1g24520-AGP50C 68414.m03087 anther-specific protein agp1 identical to agp1 GI:780177 from [Arabidopsis thaliana]  
MGRQNIVVVVALVFMAIIGLAAAASSPSPSASPSKAPAASKTDHVEAPVTDDQIGTTDDDAAPTFGDGDVAVAGPLGSDSSYDNAPTGSADSAKSGAAALGVS AVVVGVHPLLVLSCYSKLGIVL

>At1g31250-AGP51C 68414.m03825 proline-rich family protein contains proline-rich extensin domains, INTERPRO:IPR002965; similar to prolin rich protein GB:S44189 GI:433706 from [Zea mays]  
MANQYFRMAFLLCFLSLSYQSIRIEAREGKACIGNCYGSSAPVPPNASLSIPPNSSPSVKLTTPPYASPSVKLTTPPYASPSVRPAGTTPNASPSVKLTTPPYASPSMRPAGTPNASPSVKLTTPPYASPSVRPTGTTPNASPSLTTPPNPSPSEKFIPPNASPFIHT

>At1g35230-AGP5C 68414.m04369 arabinogalactan-protein (AGP5) identical to gi 3883128 gb AAC77827  
MASKSVVVFLLFLLVASSVVAQAPGPAPTISPLPATPTPSQSPRATAPAPSPSANPPPSAPTTAPVVSQPPTESPPAPPTSTSPSGAPGTNVPSGEAGPAQSPLSGSPNAAAVSRVSLVGTTFAGVAVIAALLL

>At1g63530-AGP52C 68414.m07182 hypothetical protein  
MRVDFSEPEYRNCYHCRDSGILNTQESEPNNVIGSSITSVPVSSGPFQALGHASAAIGSTSTSSPVQSSSSFSFGSPAATTSVGVSSSTSTPTPISFLFPFYVPPPPSSSLSGPAQNVWISAYSTAGRGVEWAWARPDVAVYPASSSSSTSTVVFGTTPVSVSSLFGPSQDFPKTTFACSSTPAPTRCECSFAKPFPGSSPASSSSNLFGPNPSTTTASVFGTSATSGSSLFGPAQHPLSYDSIGGSFAFAGVKTS SPQPLGFNGATLLPSSHEGQNISSFKPYVDKSHDELWYKKEAKGGSFPAAHASPIGSKPNAVFSPTVSTSLFASPSVDPDHHQRTNFSTTLGNFTGPAFGFFPAAAGGATTFSSSTGFGQNPAPFPFGFDSQFPFAFSSFSSTTYPAVSSSVQRPHETGAVSSPAFGCTACGATSSSSASDHFTFNGATTPPGLFFPTTSSGPMFMTLLAAQGTTPALQTYPVQGFILLPFAAMSLQ

>At1g63540-AGP53C 68414.m07183 hydroxyproline-rich glycoprotein family protein  
MKIDFSEPECSNCYQFTNPDLLNTPSEQSNVIGSSITSVPVNDGPVPPLELDSAAVVSTSTSSPVQALGHDSGATVSTSTSSPVQIFSSPFSFGSAHAATPVSSGPAPSPPTFGEPRILLATSGSGASATSTSSSTSSPLHSSPFSFGSAPAAITSVSSGPAQSPASSPRLWIDRFATSSSASATSSSSTSSPFHSSLLGFAPA VTSVSSAPTACGPQTQAFQPTQAFGLSMFGSTPRFEITGFPFQASASRNSPSPSFGPAHNCGKPAFGSPFGNNVAFARPDVGISPVASSSTSTEIFGATPALSLSFPFGPMQAPVQASASSTSTFPFGCVPPSPSSGSLFNSAFGSLPAPSSSNFFGQSSSNLLGQNPSTTGVGYPG SPLNSSFPGFVGYPGSSSNLFRSNPPNFGGSGIGAGPQHFGFNGDASVLPSTPFSLSPAFSSNTNTGSPYFASH EWSRPTEQGSMNPGYAPTHEGDNSSGWSFPTSKGNIYISISASKPYLHKSHEELRWEDYKQGDGKGGPFPAAPASTIGSRPNAAFSPPTVSPPAHGCTACGATSSSSASRHFTFNGATSPPSAATTPPGLFFPSTGFAPMMFGTNLAVQGTSPALQAYPVQGYILLPFAAMTLQ

>At2g14890-AGP9C 68415.m01693 arabinogalactan-protein (AGP9) identical to gi|10880495|gb|AAG24277  
MARSFAIAVICIVLIAGVTGQAPTSPTATPAPPTPTTPPPAATPPPVASPPVTTSPPPVTTAPPANPPPPVSSPPASPPPATPPPVASPPPPVASPPPATPPPVPATPPPAPLASPPAQVPAPAPTTKPDSPSPSPSSSPPLPSSDAPGPS TDSISPAPSPTDVNDQNGASKMVSSLVFGSVLVWFMI

>At2g22470-AGP2C 68415.m02664 arabinogalactan-protein (AGP2) identical to gi|3883122|gb|AAC77824; supported by cDNA gi|3883121|gb|AF082299  
MNSKAMQALIFLGLFATSCLAQAPAPAPTTPVTPPTALPPVTAETPSPIASPVPVNEPTPAPTTSPPTSPVASPPQTDAPAPGPSAGLTPTSSPAPGPDGAADAPSAAWANKAFLVGTAVAGALYAVVLA

>At2g28440-AGP54C 68415.m03455 proline-rich family protein contains proline-rich extensin domains, INTERPRO:IPR002965; contains similarity to vegetative cell wall protein gp1 [Chlamydomonas reinhardtii] gi|12018147|gb|AAG45420; +  
MAKKLCFIVMLSLICLLIFDFAGAQEESPSPAAVSPGREPSTDSPLSPSSSPEEDSPLSPSSSPEEDSPLPPSSSPEE  
DSPLAPSSSPEVDSPLAPSSSPEVDSPQPPSSSPEADSPLPPSSSPEANSPQSPASSPKPESLADSPSPPPPPQPE  
SPSSPSYPEPAPVPAPSDDDDSDDDPEPETEYFSPSPAPSPELGMAQDIKASDAAGEELNDERGEDYGMGSLKAGIAI  
GTILGVGAIIVIGALVYKKRRDNMTRARYTYFTEGEFL

>At2g45000-AGP55C 68415.m05603 expressed protein contains Pfam profile:  
PF05064 NSP1-like C-terminal region  
MSGFPFGQNSVGGFSGSSSATNSSASSTTSPLSFSFNQSSNPSSSTGFGFGSSVSSTPASSTTPSFGFGASSTPS  
FGFGSSASSSTPSFGFGSSASVTPASTTPSFGFGTAASSSAPAPSLFGSSTTNASSAAPGSSPFGFVTSSASSTATP  
SSSLFGAPASSAATPSSSPFGAAPASGSTPLFGSSPSLFSAPSSASANSSSLFGASSAATSTSPFLFGAPSSATGAT  
PSFSVASSAPGSSSIFGATGSSPSFSVASSASGSSPSIFGATGSSPFFGSSSSAGSTPSLFASSSSGATTSSPSPF  
GVSTFNSSSTSNASASPFSASTGFSFLKSTASSTTSSTTPSAPPQTASSSSSFSFGTSANSGFNLSTGSSAAPA  
SSTSGAVFSIATTTTTSSSTPAATSAPASSAPASTMAFSPFGVTSSATNTTPASSAATFSTTGFLASSTPATGSTN  
SFTGFAVPKTSTPASSSQPQTTSPAFSFLPSSTSTTAPATSSATTTQTTLVVPSSTGTTAVAPVAGSPKLPSEIT  
GKTVEEIIKEWNTLQERTGRFRKQANAIAEWDKRIQLNRDVLRLLEIEVAKVETQSSLERQLELIETHQOQEVDKA  
LQSMEEEAERIYNDERKSLLDDEAASTRDAMYEQSELVERELEHMTEQIRSI IQSVNANQGGELEAIDGMSPLDVVV  
RILNNQLSSLMWIDEKAEFSSRIQKIALQGGSGDRELMAPKHWMS

>At2g47930-AGP26C 68415.m05993 hydroxyproline-rich glycoprotein family  
protein contains proline-rich extensin domains, INTERPRO:IPR002965  
MSVSLFTAFTVLSLCLHTSTS EFQLSTISAAPSFLPEAPSSFSAS TPAMSPDTSPLFPTPGSSEMSPSPSESSIMPT  
IPSSLSPNPDAVTPDPLLEVSPVGSPLPASSSVCLVSSQLSSLLLVLMLLLAFCSFF

>At3g01700-AGP11C 68416.m00103 arabinogalactan-protein (AGP11) identical to  
gi|10880499|gb|AAG24279  
MARLFVVVALLALAVGTVFAADAPSAAPTASPTKSPTKAPAAAPKSSAAAPKASSPVAEPTPEDDYSAASPSDSAE  
APTSSPPAPTPEADGPSSDGPSSDGPAAESEPKSGATTNVKLSIAGTVAAAGFFIFSL

>At3g06360-AGP27C 68416.m00734 arabinogalactan-protein (AGP27)  
MASSILLTLITFIFLSSLSLSSPTTNTIPSSQTI SPSEEKISPEIAPLLPSPAVSSTQTISSSTLPEPENDDVSA  
PDPAFAPSASPPASSLASLS SQAPGVFIYFVFAAVYCFSLRLLAVSAI

>At3g22070-AGP56C 68416.m02785 proline-rich family protein contains proline-rich extensin domains, INTERPRO:IPR002965  
MLCYVGKATKIFIFIVTVVFI GLVVA FGVLRRHSHHCSGDYCSSSTDPSSSSSSSSSSSTSPFITPFPNPNPNPNPN  
PPVLGSSPPSPTDSSSSTSI SPNPPAPIVNPNP PPPPSTPNPPPEFSPPPPDLDTTTPPPPSTDIPIPPPP PAPVSA  
SPPLTPSSSVTSPAPVHAKLVND

>At3g45230-AGP57C 68416.m04881 hydroxyproline-rich glycoprotein family  
protein contains proline-rich extensin domains, INTERPRO:IPR002965; related  
to vegetative cell wall protein gp1 [Chlamydomonas reinhardtii]  
gi|12018147|gb|AAG45420  
MKLEFIIVAMMLSLVLSGEILTKSSPAPSPDLADSPLIHASPPSKLGSNHNSPAESP I EYSSPPEPETEHSPPSPSPA  
NSPSVSPPLPNDSQSPSSASPSPSPEASDVNHSDITGIEGKLPSPSGGGMGGKKGVAFAAIAAVCVVGVAGFV  
YKKRQENIRRSRYGYAAREIL

>At4g09030-AGP10C 68417.m01490 arabinogalactan-protein (AGP10) identical to  
gi|10880497|gb|AAG24278; supported by Ceres cDNA 265772  
MASKSVVLLFLALIASSAIAQAPGPAPTRSPLPSAQPRTAAPTPTPTPTPSATPTAAPVSPAGSPLPSS  
ASPPAPPTSLTPDGAPVAGPTGSTPVDNNAATLAAGSLAGFVVASLLL

>At4g16980-AGP58C 68417.m02560 arabinogalactan-protein family similar to  
arabinogalactan protein [Arabidopsis thaliana] gi|10880495|gb|AAG24277;  
contains proline-rich extensin domains, INTERPRO:IPR002965

MASSFSSQAFFLLTLSMVLIPFSLAQAPMMAPSGSMSMPMSSGGGSSVPPVMSMPMMTPPPMPMTPPMPMTTP  
PMPMAPPPMPMASPPMPMTPTSTSPSPLTVPDMPSPMPMSGMESSPSPGMPMPAMAASPD SGAFNVRNNVTLSCVV  
GVVAAHFLLV

>At4g40090-AGP3C 68417.m05675 arabinogalactan-protein (AGP3) InDels between the genome sequence and the cDNA prevent identical translations from being annotated; the basis for this is under investigation.  
MALKTLQALIFLGLFAASCLAQAPAPAPITFLPPVESPSPVVTPTAEP PARCFTPYSSQORTHSGSNNSTNRLTPDHV  
AHNFPCRFS

>At5g10430-AGP4C 68418.m01209 arabinogalactan-protein (AGP4) identical to gi 3883126 gb AAC77826  
MGSKIVQVFLMLALFATSALAQAPAPTPTATPP PATPPPVATPPPVATPPPAATPAPATPP PAATPAPATTPPSVAP  
SPADVPTASPPAPEGPTVSPSSAPGPSDASPAPSAAFSNKAFFAGTAFAAIMYAAVLA

>At5g14380-AGP6C 68418.m01680 hydroxyproline-rich glycoprotein family protein identical to gi|4775268|emb|CAB42531  
MARQFVVLVLLTLTIATAFAADAPSASPKKSPSPTAAPTAKAPTATTKAPSAPTKAPAAAPKSSSASSPKASSPAAEG  
PVPEDDYSASSPSDSAEAPT VSSPPAPT PDSTSAADGPSDGTAE SPKSGAVTTAKFSVVGTVATVGGFFFSF

>At5g18690-AGP25C 68418.m02218 hydroxyproline-rich glycoprotein family protein contains proline-rich extensin domains, INTERPRO:IPR002965; Common family member: At3g06360 [Arabidopsis thaliana]  
MAFSFLNKLIIIFIFIFISLSSSPTISLVQQLSPEIAPLLPSPGDALPSDDGSGTIPSPSPDPDPTNDGSYPDPL  
AFSPFASPPVSSPSPPSLPSAGVLLISLISSASFLAL

>At5g64310-AGP1C 68418.m08078 arabinogalactan-protein (AGP1) identical to gi:3883120 gb:AAC77823  
MAFSKSLVFVLLAALLISSAVAQSPAPAPSNVGGRRISPAPSPKMMTAPAPAPEVSPSPSPAAALTPESSASPPSP  
LADSP TADSPALSPSAISDSPTEAPGPAQGGAVSNKFASFGSVAVMLTAAVLVI

>At5g65390-AGP7 68418.m08224 arabinogalactan-protein (AGP7)  
MNSKIIIEAFFIVALFTTSCLAQAPAPSPTTTVTPPPVATPPPAATPAPTTPPPAVSPAPTSSPPSSAPSPSSDAPT  
ASPPAPEGPGVSPGELAPTPSDASAPPPNAALTNKAFVVGSLVAIIYAVVLA

>At1g68725-AGP19K 68414.m07853 arabinogalactan-protein, putative (AGP19) non-consensus splice site at the intron:exon boundary (AT:exon)  
MESNSIIWSLLLASALISSFSVNAQGPAASPVSTTTTAPPPTTAAPPTTAAPPTTTTTPVSAQAQPPASPVTPPPAV  
TPTSPAPKVPVISPATPPPQPPQSPASAPT VSPPPVSPPPAPTSPPTPASPPAPASPPPAPASPPPAPVSP  
PVQAPSPISLPPAPAPAPT KHKRKHKHKRHHHAPAPAPIPPSPSPSPVLTDPQDTAPAPSNTGGNALNQLKGRAVM  
WLNTGLVILFLLAMTA

>At2g23130-AGP17K 68415.m02760 arabinogalactan-protein (AGP17) identical to gi 11935086 gb AAG41963  
MTRNILLTVTLICIVFITVGGQSPATAPIHSPSTSPHKPKPTSPAISPAAPTPESTEAPAKTPVEAPVEAPPSPTPA  
STPQISPPAPSPPEADTPSAPEIAPSADVAPALTKHKKKTKKKHTAPAPGPASELLSPPAPPGEAPGPGPSDAFSPA  
ADDQSGAQRISVVIQMVGAAAIWSLLVLA

>At4g37450-AGP18K arabinogalactan-protein (AGP18) identical to gi 11935088 gb AAG41964  
MDRNFLTTLICIVVAGVGGQSPISSPTKSPTPSAPTTSPTKSPA VTSPTTAPAKTPTASASSPVESPKSPAPVS  
ESSPPPTPVPESSPPVPAPMVSSPVSPVPAPVADSPAPVAAPVADVPAPAPSKHKKTTKSKKHQAAPAPAPEL  
LGPPAPPTESPGPNSDAFSPGPSADDQSGAASTRVLRNVAVGAVATAWAVLVMAF

>At1g51915-AGP42P 68414.m05852 cryptdin protein-related contains weak similarity to Swiss-Prot:P17533 cryptdin-related protein 1C precursor (CRS1C) [Mus musculus]

MATERFSTMLISVLVLAALVLSPIPCQA TRAHLDAETRMLRRVCPSCVCCAPAPRGACCPCRCPKNP

>At1g55330-AGP21P 68414.m06321 arabinogalactan-protein (AGP21)  
MEAMKMKMMVFIMVVAFAAATAATVEAPAPSPTSDAAMFVPALFASVVALASGFIF

>At2g41905-AGP43P 68415.m05184 expressed protein  
MEMKKIACGVVFAAASMTAVMAAEVGGAPAPGPAASGASVAVPALGSLVGLVSLFAYYLN

>At2g46330-AGP16P 68415.m05764 arabinogalactan-protein (AGP16) identical to  
gi|10880509|gb|AAG24284  
MASRNSVTGFALFSFVFAVILSLAGA QSLAPAPAPTS DGTSIDQGIAYLLMVVALVLTLYLIHPLDASSSYSFF

>At3g01730-AGP44P 68416.m00109 expressed protein  
MRAFSLMICVVLVLA TLIMVAESKSSYSGNDETLTPPPMAPSPSPTGTDGGHFGEPKTLPPPNAAATFTTCPLLITS  
TLISALAFVF

>At3g13520-AGP12P 68416.m01700 arabinogalactan-protein (AGP12) identical to  
gi|10880501|gb|AAG24280  
MESMKMKLIVVLMVAIVAFSAVGNVAAQTEAPAPSPTSDAAMFVPALFASVAALASGFLF

>At3g20865-AGP40P 68416.m02638 arabinogalactan-protein, putative (AGP)  
similar to gi|10880503|gb|AAG24281  
MEMKNIFVALFISAVLVSSVSAATMESPAPSPGASSASTVAFPVVGSIVAASLSAFLALLLQ

>At3g57690-AGP23P 68416.m06427 arabinogalactan-protein, putative (AGP23)  
similar to arabinogalactan protein [Arabidopsis thaliana]  
gi|10880503|gb|AAG24281  
MEMKKIACGVLF A AASMTAVMAAEVGGAPAPGPASAASAALPALGSLVGLVSLFSSYYLH

>At3g61640-AGP20P 68416.m06908 arabinogalactan-protein (AGP20)  
MASRNSVAVIALFAFVFAVISPFAGA QSLAPAPSPTSDGTSIDQGIAYLLMVVALVLTLYLIHPLDASSSYTFF

>At4g26320-AGP13P 68417.m03785 arabinogalactan-protein (AGP13) identical to  
gi|10880503|gb|AAG24281  
MEAMKMRFLFVAVLVAAMAFSAVQQA AAEVAPAPSPTS DASLAIPAFFASVATLAFGFLF

>At5g11740-AGP15P 68418.m01371 arabinogalactan-protein (AGP15) identical to  
gi|10880507|gb|AAG24283  
MAISKASIVVLMVVIISVVASAQSEAPAPSPTS GSSAISASFVSAGVA AVALVFGSALRI

>At5g12880-AGP45P 68418.m01478 proline-rich family protein similar to  
hydroxyproline-rich glycoprotein gi|169345|gb|AAA33763  
MRRSWPTRLILLMVLTVVITMIAAAYGYSSVSSSKHKFPHYKYKAPSPPTTYSPIRYFSPPPVTDSDSAAYVR

>At5g24105-AGP41P 68418.m02831 expressed protein  
MSGSRLLFFGVSTIVSIIFAILLPMAHAQSAAPAPAPTS DGTTIDQGIAYVLMMLVALVLTLYLIH

>At5g40730-AGP24P 68418.m04943 arabinogalactan-protein (AGP24)  
MMMMTKMFVQIAVVCLLATMAVVSAHEGHHHHAPAPAPGPASSSTVVSATNMFTVLAIAAVALVGSNH

>At5g53250-AGP22P 68418.m06619 arabinogalactan-protein, putative (AGP22)  
similar to arabinogalactan protein [Arabidopsis thaliana]  
gi|10880509|gb|AAG24284  
MASLKFPLEILAVFVIISVILLPIAQS HSSSPAPAPTS DGTSIDQGIAYVLMMLVALTYFIH

>At5g56540-AGP14P 68418.m07056 arabinogalactan-protein (AGP14) identical to  
gi|10880505|gb|AAG24282

MEAMKMKLYVVVVLVAVIAFSTVHQTVAVDAPAPSPTSDASSFIPTFFASVAVMAFGFFF

>At1g03870-FLA9 68414.m00371 fasciclin-like arabinogalactan-protein (FLA9)  
identical to gi 13377784 gb AAK20861

MATTRLTLAPLLLIAAVLLATKATAQPAAPAPEPAGPINLTAILEKGGQFTTFIHLNITQVGSQVNIQVNSSSEGM  
TVFAPTDNAFQNLKPGTLLNQLSPDDQVKLILYHVSPKYYSMDLLSVSNPVRTQASGRDNGVYGLNFTGQTINQINVS  
TGYVETRISNSLRQORPLAVYVVDMLLPGEMFGEHKLSPAPAPKSKSGGVTTDDSGSTKKAASPDKSGSGEKKVG  
LGFGLGLIVLCLKFLF

>At1g15190-FLA19 68414.m01816 hypothetical protein

MAKISSASCRAIFLGLALIILCLPHPSTGVPLEELERAIAILRVGRALFANAIITSDLLFDLLSDESLTLFAPTDS  
MLFDLDMTHSLPFYVSTLRLHSLPLRLSLGLRSLPNSSSLPTLLPSHRLLLTKHSSSNDSIFLDGVQLLIPGLFDG  
QHIAVHGLADLLPLTAPSSPNRLVEDSTALAKSPWFLGSRFSPAPEPYFAFMDLSPAESPVEEVSPSPSWGEGEED  
FIVGDEGGPLDGRNNGF

>At2g04780-FLA7 68415.m00488 fasciclin-like arabinogalactan-protein (FLA7)  
identical to gi 13377782 gb AAK20860

MAKMQLSIFIAVVALIVCSASAKTASPPAPVLPPTPAPAPAPENVNLTELLSVAGPFHTFLDYLLSTGVIETFQNOA  
NNTTEGITIFVPKDDAFKAQKNPPLSNLTKDQLKQLVLFHALPHYYSLSEFKNLSQSGPVSTFAGGQYSLKFTDVS  
TVRIDSLWTRTKVSSSVFSTDPVAVYQVNRVLLPEAIFGTDVPPMPAPAPAPIVSAPSDSPSVADSEGASSPKSSHK  
NSGQKLLLAPISMVISGLVALFL

>At2g20520-FLA6 68415.m02397 fasciclin-like arabinogalactan-protein (FLA6)  
identical to gi|13377780 gb AAK20859

MSSSLFSYVLLIFLFTIPYIQSQPTAPAPTTEKSPINLTAILEAGHQFTTLIQLLNTTQVGFQVSVQLNSSDQGMT  
IFAPTDNAFNLKPGTLLNSLTYQQIQLMLYHIIPKYYSLSDLLASNPVRTQATGQDGGVFGFLNFTGQAQSNQVNV  
STGVVETRINNLRQQFPLAVYVVDVSVLLPEELFGTKTTPGTGAPAPKSSSTSSSDADSPAADDEHKSAGSSVKRTSLG  
IVVSFALFCCSVIYIA

>At2g24450-FLA3 68415.m02922 fasciclin-like arabinogalactan family protein  
similar to fasciclin-like arabinogalactan-protein 1 [Arabidopsis thaliana]  
gi|13377776|gb|AAK20857

MGLKVSSSLCLTILLAVSSIVSAVNITRVLEKYPEFSTMTTELLAKTELTPPIINKRQTITVLALNNDIAIGSISGRPE  
EEVKNILMNHVVLDYFDELKALKALKEKSTLLTTLTQSTGLGQQQNGFLNCTKSNKGIYFGSGVKGAPQTAEYITTVF  
RNPYNLSVVQISMPIVAPGLGSPVKVPPPPMSSPPAPSPKKGAA TPAPAPADEGDYADAPPGLAPETAPASAPSES  
DSPAPAPDKSGKKKMAAADEAEPPSSASNTGLSFGAVLVLGFVASFVGF

>At2g35860-FLA16 68415.m04403 beta-Ig-H3 domain-containing protein /  
fasciclin domain-containing protein contains Pfam profile PF02469: Fasciclin  
domain

MDSSYGATKFLLLLFLTTSIATA LPDNKPVPQGINSNSVLVALLD SHYTELAELVEKALLLQ TLEEAVGKHNITIFA  
PRNDALERNLDPLFKSFLLEPRNLKSLQSLLMFHILPKRITSPQWPSLSHHHRTLSNDHLHLTVDVNTLKVDSAEII  
RPDDVIRPDGIIHGIERLLIPRSVQEDFNRRRSLRSISAVIPEGAPEVDPRTHRLKKPSPAVPAGAPPVLPPIYDAMS  
PGPSLAPAPAPGPGGPRGHFNQDAQVKDFIHTLLHYGGYNEMADILVNLTSLATMGRLVSEGYVLTVLAPNDEAMA  
KLTTDQLSEPGAPEQIMYYHIIPEYQTEESMYNAVRRFGVKVYDSLRFPHKVLAQEADGSVKFGHGDGSAYLFDPI  
YTDGRISVQIGDGVLFPKKE TPA TEIKPAAPVVKVSKSRRGKLMVACRMMGSRFIPCQ

>At2g45470-FLA8 68415.m05655 fasciclin-like arabinogalactan-protein (FLA8)

MAASQTFSLLAFTFSLLAFASTVSSHNITQILADSPDYSSFNSYLSQTKLADEINSRTTITVLVLNNGAMSALAGKH  
PLSVIKSALSLLVLLDYYDPQKLHKISKGTTSTTLTSTLYQTTGNAPGNLGFVNITDLKGGKVGFGSAASGSKLDSSYTK  
SVKQIPYNISILEIDAPIIAPGVLTAPAPSASLSNITGLLEKAGCKTFANLLVSSGVLKTYESAVEKGLTVFAPSDE  
AFKAEGVPLTKLTQAEVVSLLLEYHALAEYKPKGSLKTNKNNISTLATNGAGKFDLTTSTSGDEVILHTGVAPSRLA  
DTVLDA TPVVIIFTVDNVLPAELFGKSKSPSPAPAPEPVTAPTSPADAPSPTAASPPAPTDESPESAPSDSPTGS  
ANSKSANA AVGVSTPSLFTALVTIAAIVSVSLCS

>At3g11700-FLA18 68416.m01434 beta-Ig-H3 domain-containing protein / fasciclin domain-containing protein contains Pfam profile PF02469: Fasciclin domain

MDRCIYGCSVITIFFSFFFLN~~ASA~~LES~~GH~~HNITGSGQINSNSVLVALLDSRYTELAELVEKALLLQ~~TLE~~DAVGRHN  
ITIF~~AP~~RNEALERDLDPDFKRFL~~LQ~~PGNLKSLQ~~TLL~~LSHII PKRVGNSQWPEENSGRVKHVTLGHDQVLHLSK~~LK~~GT  
NGKRLVNSAVITRPDDLTRPDGLIHGIERLLI PRSVQEDFNRRRNLRSISAVLPEG~~AP~~EIDPRTNRLKKSATAVSV~~P~~  
~~AG~~SPVVLPIESAM~~AP~~GPSL~~AP~~~~AP~~~~AP~~GPGGAHKHFNGDAQVKDFIHTLLHYGGYNEMADILVNLTSLATEMGR~~L~~VSEG  
YVLTVL~~AP~~NDEAMGKLT~~TD~~Q~~L~~SEPG~~AP~~EQIMYYHIIPEYQTEESMYNSVRRF~~G~~KVKYETLRFPHKVGAK~~E~~ADGSVKF  
GSGDRSAYLFD~~PD~~IYTDGRISVQ~~G~~IDGVLFPEEKEEETVKKPTG~~P~~VKKV~~VQ~~PRRGK~~L~~LEVAC~~S~~MLGAIGK~~D~~SYL~~S~~R~~C~~

>At3g12660-FLA14 68416.m01578 fasciclin-like arabinogalactan family protein similar to fasciclin-like arabinogalactan-protein 1 [Arabidopsis thaliana] gi|13377776|gb|AAK20857;

MSSSLT~~IFF~~FFFF~~FAST~~FLYTSSNS~~FN~~ITNILNEHDDFSN~~F~~NQLLSETQLASTINKRQTITVLVVSNGALSSLSGQPTS  
VIKKILSLHIVLDY~~YD~~QK~~KL~~KNLSKKT~~V~~LLTTLFQSSGLARGQ~~Q~~GF~~L~~NATVMKNGDVAF~~G~~SAVPGSS~~L~~DAQLQ~~D~~TVA  
ALPFNISVLHISSAIMIDVKGD~~N~~APTAS~~PL~~SPVS~~SP~~PR~~PA~~ESP~~N~~DDGQDFDEPPSS~~AP~~GAAADEPSENAG~~S~~ANGV~~S~~R  
NDSQPAFAFTLLMSFIW~~W~~F~~M~~AR~~L~~R

>At3g46550-FLA4 68416.m05053 fasciclin-like arabinogalactan family protein similar to fasciclin-like arabinogalactan protein FLA8 [Arabidopsis thaliana] gi|10880493|gb|AAG24276

MANVISISHFTLLALPYLLLLLSSTAAA~~IN~~VTA~~V~~LVSSFPNLS~~S~~FSNLLVSSGIAAELSGRNSLTLLAVPNSQFSSAS  
LDL~~T~~RRLPPSALADLLRFHVLLQFLSD~~S~~DLRRIPPSGSAVTTLYEASGR~~T~~FFGSGSVNVTRD~~PA~~SGSVTIG~~S~~PATKN  
VTVLK~~L~~LETKPPNITVLTVD~~S~~LIVPTGIDITASETL~~TP~~PPTSTSL~~S~~PP~~PA~~GINLTQILINGHNFNVALSLLV~~V~~ASGVI  
TEFENDERGAGITV~~F~~VPTDSAFSD~~L~~PSNVNLQSL~~PA~~EQKAFVLK~~F~~HVLHSYYTLGSLESITNPVQPTLATEEMGAGS  
YTLNISR~~V~~NGSIVTINS~~G~~VVLAVVTQTAFDQNPVSVF~~G~~VSKVLLPKELFPKSGQPVAT~~AP~~PQEISL~~S~~PESSESSEQPSR  
LV~~SP~~PREIVSSGAVKRPLGFLVLWCWCIAFCYV~~L~~V

>At3g52370-FLA15 68416.m05756 beta-Ig-H3 domain-containing protein / fasciclin domain-containing protein weak similarity to osteoblast S~~P~~ecific factor 2 [Homo s~~AP~~iens] GI:393319; contains Pfam profile PF02469: Fasciclin domain; supporting cDNA gi|26450295|dbj|AK117608.1|

MDDL~~SK~~LLFFLLLTISITTA~~LP~~DKPGSGQINSNSVLVALLDSHYTELAELVEKALLLQ~~TLE~~EAVGQHNITIF~~AP~~RND  
ALEKNLDPEFKS~~F~~LLQPKNLKSLQ~~S~~LLMFHILPKRIT~~SP~~QFSSAVVSHRTLSNDHLHFTNGK~~V~~NSAEITK~~P~~DDLTRP  
DGI~~I~~HGIERLLI PRSVQEDFNRRRSLRSIAAVLPEG~~AP~~EVDPRTHRLKKK~~PAP~~I~~PA~~G~~AP~~PVLPVYDAM~~SP~~GPSL~~APA~~  
~~PAP~~GPGGPRHHFN~~G~~E~~A~~QVKDFIHTLLHYGGYNEMADILVNLTSLATEMGR~~L~~VSEGYVLTVL~~AP~~NDEAMAKLT~~TD~~Q~~L~~S  
EPG~~AP~~EQIMYYHIIPEYQTEESMYNSVRRF~~G~~KIRYDSLRFPHKVEAQEADGSVK~~F~~GHDGSAYLFD~~PD~~IYTDGRISV  
Q~~G~~IDGVLFPEEK~~TP~~V~~E~~KKTGVPV~~V~~KK~~AP~~K~~PR~~R~~G~~KLM~~E~~VACTMLGSQFPTCQ

>At3g60900-FLA10 68416.m06813 fasciclin-like arabinogalactan-protein (FLA10)

MATSRAFTLFAFTLSLLT~~V~~ASTVSG~~HN~~ITQILSD~~TP~~EYSSFN~~Y~~LSQTKLADEINSR~~T~~ITVLV~~L~~NNGAMSSLAGKH  
PLSVVKNALSLLVLLDYDPLKLHQLSKGTTLT~~T~~T~~T~~LYQTTGHALGNLGFVNVTDLKG~~G~~KVGF~~G~~SA~~AP~~GSKLDSSYTK  
SVKQIPYNISVLEIN~~APII~~~~AP~~GIL~~T~~APAPSSAGVSNITGLLEKAGCKTFANLLVSSGVIKTFESTVEKGLT~~V~~F~~AP~~SD  
EAFKARGVPDLT~~N~~LQAEVVS~~L~~LLEYHALAEYKPKGSLKTNKDAISTLATNGAGKYDLT~~T~~STSGDEVILHTGVG~~P~~SRL  
ADTVVDE~~TP~~VVIFTVDNVLL~~PA~~ELFGKSS~~SP~~AP~~AP~~EPV~~S~~APT~~TP~~PAK~~SP~~SPVE~~AP~~SPTAA~~SPP~~APVDES~~S~~PEG~~AP~~S  
DSPTSSSENSNAKNAAFHV~~N~~APALFTALVTIAAT~~S~~LLL

>At4g12730-FLA2 68417.m01999 fasciclin-like arabinogalactan-protein (FLA2) identical to gi 13377778 gb\_AAK20858

MAYL~~RRA~~ATA~~LV~~LIFQLHLFLSLSNA~~HN~~ITRILAKDPDFSTFNHYLSATHLADEINRRQTITVLAVDNSAMSSILSN  
GYSLYQIRN~~I~~LSLHVLDYDFG~~T~~KKLHQITDGSTSTASMFQSTGSATGTSGYINITDIKGGK~~V~~AFGVQDD~~D~~SKLTAHY  
VKS~~V~~FEKPYNISVLHISQVLT~~S~~PEAE~~APT~~AS~~SP~~SDLILTILEKQ~~G~~CKAFSDILKSTGADKTFQ~~D~~TV~~D~~GGLTVFCPSD  
SAVGK~~F~~MPK~~F~~KS~~L~~SPANKTALVLYHGMPVYQSLQMLRSGN~~G~~AVNTLATEGNNK~~F~~DFTVQNDGEDVTLETDV~~V~~TAKVM  
GTLK~~D~~QEPLIVYKIDK~~V~~LLPREIYKAVKTS~~AP~~APKSSKKKPKNAEADADG~~P~~SAD~~AP~~SDDDVEVAD~~D~~KNGAVSAMITR  
TSNVVTAIVGLCFGVWLM

>At4g31370-FLA5 68417.m04448 fasciclin-like arabinogalactan family protein similar to fasciclin-like arabinogalactan-protein 1 [Arabidopsis thaliana] gi|13377776|gb|AAK20857

MGLKASLSLLSLTILLVFSKVVTA  
NNITLAFQKYSKFSTMRDLFIKTKLIAAIDKYQTITVLAVSNDAISSITNRSE  
VELRNILMTHVILDYYDELKLGQGMREKSI MLTTLTYQT TGLGEMNGFLNVSKSKGRVYFGSEVKNSPLNAEYVSTVY  
HNPYNLSIIQITMPIVAPGLSLAIFPPPPYVHVAPYPTPMDASVVPAPGPA  
ADDNSPDSAVPKTTPAPATDTPEAD  
SPAPAP  
SADNEKIEAADKAKPSS  
SASKAGWSFDVILLFLASFAF

>At5g03170-FLA11 68418.m00265 fasciclin-like arabinogalactan-protein (FLA11)  
MATSRTFIFSNLFIFFLVIATTYQ  
APAPGPGSGPTNITAILEKAGQFTLFI RLLKSTQASDQINTQLNSSSSNGLTV  
FAPTDNAFNSLKSGLNLSLSDQKQVQLVQFHVLP  
TLITMPQFQTVSNPLRTQAGDQNGKFP  
LNITSSGNQVNIITG  
VVSATVANSVYSDKQLAVYQVDQVLLPLAMFGSSV  
APAPAPEKGGSVSKGSASGGDDGGDSTDS  
SDAERTGFGFGIR  
ITTVAAIAASSLWI

>At5g06390-FLA17 68418.m00715 beta-Ig-H3 domain-containing protein / fasciclin domain-containing protein contains Pfam profile PF02469: Fasciclin domain

MDRRIYGGSAVIHLFLFFSVLIFSAASALS  
KNQSPSSGSGQINSNSVLVALLDSRYTELAELVEKALLLQTL  
EDAVG  
RHNITIFAPRNEALERDLDFEFKRFLL  
EPGNLKSQTLLMFHII  
PNRVGSNQPSEESGRVKHHTLGN  
DQVRLSNGQ  
GKKMVDLAEIIRPDDLTRPDGLIHGIERLLI  
PRSVQEDFNRRRSLSISAVLPEGA  
PEVDPRTNRLKKPAAPVPAGS  
PPALPIQSAMAPGPSLAPAPAP  
GPGGKQHFDGEAQVKDFIHTLLHYGGY  
NEMADILVNLTSLATEMGRVSEGYVL  
TVLAPNDEAMAKLTTDQLSEPGA  
PEQIVYYHIIPEYQTEESMYNSVRR  
FGVKVFDTLRFPHKVAAKEADGSVK  
FGDG  
EKSAYLFDPIYTDGRISVQIGDGVLP  
QEEVSVKPKPKIVQPRRGLLEVAC  
SMLGAFGKDTYLSKCR

>At5g06920-FLA21 68418.m00782 hypothetical protein

MGCCSSDCFVYFILSIALAFMAISTTLRSP  
PDSEPTIPIAFSSSSP  
SLSLNASNTLRQSNFKAIATLLHI  
SPEIFLS  
SSPNTTLFAIEDASFFNTSSLHPLFLKQL  
LLHYHTLPLMSMDLLKKPQGTCLPTLL  
HHKSVQISTVNQESRTAEVN  
HVRITHPDMFLGDSLVIHGVI  
GPFSP  
LQPHSDHLIHTPLCQSDTTNKT  
SNNEVPVSI  
DWTRIVQLLSSNGFV  
PFAI  
GLHSVLNRIVNDHNNHKNLTGV  
TILATPNLVSLSAS  
SPFLYEVRHHILVQRLTYKDFASMS  
DKATVKTLDPYQDLT  
ITRRNVNSSGGDFMISGVEIVDPDM  
FSSSNFVIHGISHLTLEIPHV

>At5g40940-FLA20 68418.m04971 hypothetical protein

MNKKPSKYFPSLNRTDYKNCNFCNGFSLK  
PNEKSSKNASMASKLLTTF  
FLIFFVLDIDLVATSMTSVSSAVEVLS  
DSGYLSMGLTLKLANQDLNLEDWQELTLF  
APSDQSFSKFGQPSLLDMKYQLSP  
TRLPGETLRNLPNGAKIPTLR  
SNY  
SLTVTNSSRFGGKTSINNVVVQD  
SPVFDGYYVVIYGSDEFFT  
SPTKISDDSSSSSSIPSTTS  
TGSIPSSATQTP  
PSPNIASDSTRNLPNRSKPVNRFNIF  
ESASRLMSRGFVIIATFLALQ  
LEDNTSGNDTKITVFAPI  
IDEAIPNPTTKF  
SDYVTIFRGHVVSQLLLWKDLQKFA  
KEGSILQTVLKGYEIEISLSG  
DILLNGVPLIYPDLVNDWIAVH  
GFNQMIV  
TKEKQVDVGDSTITV  
LNNGEQEEGVHGEYSSELG  
DYGLH

>At5g44130-FLA13 68418.m05401 fasciclin-like arabinogalactan-protein, putative similar to gi 13377784 gb\_AAK20861

MATPLLLLLLTAVFLSTEITAQRAAPAPG  
PAGPINITAILEKGGQFVTLIRLLNTTQ  
IGNQINIQINSSSEGMTVL  
APTDFNAFQNLKPGTLNKLSP  
DDQVKLILYHVS  
PKFYTLEDLLSVSNPVRTQASGRD  
VGGVYGLNFTGQGNQVNVSTG  
VVETRLSTSLRQERPLAVYV  
VDMVLLPEEMFGERKI  
SPMAPPKSKSP  
DVSDSESSKAAAPSESEKS  
GSGEMNTG  
LGLGLGLVVLCKFL

>At5g55730-FLA1 68418.m06947 fasciclin-like arabinogalactan-protein (FLA1) identical to gi|13377776||AAK20857|13377775|gb|AF333970

MAKKMSSLIIFNILLTQT  
THANVTRLLANHPSFSSFS  
HFLTQTHLADEINRRRTITV  
CAVDNAAMSALTSKGY  
TLSTLKNILSLHVLLDYFGTK  
KLHQIRDGSALAATLFQATGA  
APGTSGFVNITDLRGGKVG  
FGPDGGDLSFFVKSIE  
EVPYNISIIQISRVL  
PSETAAAPTAPAE  
MNLTGIMSAHGCKVFA  
ETLLTNP  
GASKTYQESLEGGMTV  
FCPGDDAM  
KGFLPKYKNLTAPKKEA  
FLDFLAVPTYY  
SMAMLSNNGPMNT  
LATDGANKFELTVQ  
NDGEKVT  
LKRINTVKIVDTL  
IDEQPLAIYATDKVLL  
PKELFKASAVE  
APAPAPAPEDGDVAD  
SPKAAK  
GKAKGKKKAA  
APSPDNDPFGDSD  
SPA  
E  
G  
D  
G  
E  
A  
D  
D  
A  
T  
A  
D  
D  
A  
G  
A  
V  
R  
I  
I  
G  
G  
A  
K  
A  
G  
L  
V  
V  
S  
L  
L  
C  
L  
F  
A  
S  
S  
W  
L  
L

>At5g60490-FLA12 68418.m07586 fasciclin-like arabinogalactan-protein (FLA12)

MEHSLIILLFTVLLLLLTTTPGILS QPSPAVAPAPPGPTNVTKILEKAGQFTVFIRLLKSTGTVANQLYGQLNNSDNGI  
TIFAPSDSSFTGLKAGTLNSLTDEQQVELIQFHVIPSYSVSSSNFQTI SNPLRTQAGDSADGHFPLNVTTSGNTVNI  
SGVTNTTVSGNVYSDGQLAVYQVDKVLPPQVFDPRP PAPA PAPS VSKSKKKKDDSDSSSDS SPADASFALRNVGSV  
CDAVSFCVMSVMLAWFYL

>At2g23990-PAG1 68415.m02865 plastocyanin-like domain-containing protein  
MVSLISIVSVVFLFTTFYHFGEAR IINVGGLDAWKVPE SPNHLNHWAESVRFQVGDALLFKYDSKIDSVLQVTK  
ENYEKNTQKPLEEHKDGYYTTVKLDVSGPYYFISGAPSGNCAKGEKVTVVVQ SPNHPKPG PAAVTPTLPPKPS TPA  
APAPAPPTPSPKSSTSTM APAPAPA KSSAVGLVAGNGIFWASTLVAVIGLAF

>At2g25060-PAG2 68415.m02997 plastocyanin-like domain-containing protein  
MFLSASMASSSLHVAIFSLIFLFLSLAAANEVTVGGKSGDWKIPSSSYSTFEWAQKARFKVGFIVFRYESGKDSVL  
EVTKEAYNSCNTTNPLANYTDGETKVKLD RSGPFYFISGANGHCEKGQKLSLVVI SPRHSVI SPAPSPVEFEDGPAL  
APAPI SGSVRLGGCYVVLGLVGLCAWF

>At2g26720-PAG3 68415.m03205 plastocyanin-like domain-containing protein /  
mavicyanin, putative similar to mavicyanin SP:P80728 from [Cucurbita pepo]  
MALIKNNIFFTSLILFVTLFGVAVG GTVHKVGNTKGWTMIGGDYEAWASSRVFQVGDTLVFAYNKDYHDVTEVTHND  
FEMCESSKPLRRYKTGSDSISLTKPGLQHFICGVPVGHCKKQKQLQIHVL PASLGHVAVPVPGPVRSSSSSS SPSQSP  
LVDPPVNN APQYQMGPTPASHSAASADFIFTFSFDLTLIDLCTFFILFFILV

>At2g31050-PAG4 68415.m03788 plastocyanin-like domain-containing protein  
contains plastocyanin-like domain Pfam:PF02298  
MALIKSNAFFTSLILVALFGISVGTVHKVGDSDGWTIMSVNYETWASTITFQVGDLSLVFKYNKDFHDVTEVTHND  
YEMCEPSKPLARYETGSDIVILTKPGLQHFICGFPVGHCDMGKQLQIHVL PASLGPVA APVPGPVRPPSSSFS SPSQSP  
LAESPVNH APVQYQMGPTPAPH SAASNSNVWIGLCFLPLLSLILV

>At2g32300-PAG5 68415.m03949 uclacyanin I identical to uclacyanin I  
GI:3399767 from [Arabidopsis thaliana]; contains Pfam profile PF02298:  
Plastocyanin-like domain; identical to cDNA uclacyanin I GI:3399766  
MASREMLIIISVLATTILGLTVA TDHTIGGSPGWTVGASLRTWAAGQTFVAVGDNLVFSY PAAFDVVEVTKPEFDSC  
QAVKPLITFANGNSLVPLTTPGKRYFICGMPGHCSQGMKLEVNVPVPTATVAPTAPLPNTVPSLNAPSPSSVLPIQPL  
LPLNPVPVLS PSSSTPLPSSSLPLIPPLSPAL SPATAAGTSLPLFPSPGSSSSTTSTKTVTGTFPSSTTGTTADLAG  
ADSPPADSSSAKTLVLGFGFMVAMMLHLF

>At2g44790-PAG6 68415.m05574 uclacyanin II strong similarity to uclacyanin  
II GI:3399769 from [Arabidopsis thaliana]; contains Pfam profile PF02298:  
Plastocyanin-like domain; identical to cDNA uclacyanin II GI:3399768  
MAMNGLSKMAVAATAALLLVLTIVGAVA VTYTIEWTTGVDYSGWATGKTFRVGDILEFKYGSSTHTVDVVDKAGYDG  
CDASSSTENHSDGDTKIDLTKVGINYFICS TPGHCRTNGGMKLA VNVVAGSAGP PATPTPPSSSTPGTPTTPESPSPSG  
GSPTPTTPTPGAGSTSPPPPKASGASKGVMSYVLVGVSMVLGYGLWM

>At3g20570-PAG7 68416.m02604 plastocyanin-like domain-containing protein  
MARNLKSMMMLCGFLLCFLMIVDRAYA REFTVGGATGWTVPVSGSQVYSQWAEQSRFQIGDSLFLVYQSNQDSVLQVT  
RDAYDSCNTDSPTAKFADGKTSVTLNHS GPYYFISGNKDNCKKNEKLVVIVMADRSGNKNTASSP SPAPAPSGESA  
PSPPVSGTFEMTPAPTPTTSED TPNSAASSLSFVAALLGAALASTLFLH

>At3g60270-PAG8 68416.m06737 uclacyanin, putative similar to uclacyanin 3  
GI:3395770 from [Arabidopsis thaliana]; contains Pfam profile PF02298:  
Plastocyanin-like domain  
MGSTAATAALLLLLLLVAVPAVFA VTFQVGDNDGWTIGVEYTSWVSEKTFRVGDTLEFKYGPSHSVAVVNKADYDGC  
TSRPTQSFSDGDTKIDLTKVGAIFLCLTPGHCSLGMKLA VQVLA AVSLEPPP SPSAPSPSPSAPSPSPSAPSPSPS  
PGNAENLKN AASKGIMS YGKIVVTMVL MYGVLN

>At3g60280-PAG9 68416.m06738 uclacyanin 3 (UCC3) identical to uclacyanin 3  
GI:3395770 from [Arabidopsis thaliana]; contains Pfam profile PF02298:  
Plastocyanin-like domain; identical to cDNA uclacyanin 3 (UCC3)GI:3395769



MGSTVAAALLLFLAAVPAVFAATFKVGDISGWTSNLDYTVWLTGKTFRVGDTLEFVYGLSHSVSVVDKAGYDNCDDSS  
GATQNFADGDTKIDLTTVGTMHFLCPTFGHCCKNGMKLAVPVLAAAPSPSTPSSPPSPTSPSPSPSPTSPSPSPSP  
PSPSPSPSLPPSSLPPSASPPTNGTPDSETLTPPAPLPPSLSPNAASKGVMSYGIIGVTMILMYAVMT

>At4g27520-PAG10 68417.m03952 plastocyanin-like domain-containing protein  
similar to PIR|JC7196 phytocyanin-related protein Pn14 {Ipomoea nil};  
contains Pfam profile PF02298: Plastocyanin-like domain

MTFLKMKSLSEFFFTILLSLSTLFTISNARKFNVGGSGAWVTNPPENYESWSGKNRFLVHDTLYFSYAKGADSVLEVN  
KADYDACNTKNPIKRVDDGDSEISLDRYGPFFYFISGNEDNCKKGQKLNVVVISARIPSTAQSPHAAAPGSSTPGSMT  
PPGGAHSPKSSSPVSPPTTSPPGSTTPPGGAHSPKSSSAVSPATSPPGSMAPKSGSPVSPPTTSPAPPKSTSPVSPSS  
APMTSPAPMAPKSSSTIPPSSAPMTSPPGSMAPKSSSPVSNPTVSPSLAPGGSTSSSPSDSPSGSAMGPSGDGPS  
AAGDISTPAGAPGQKKS SANGMTVMSITTVLSLVLTIFLSA

>At4g28365-PAG11 68417.m04060 plastocyanin-like domain-containing protein  
MGLVMRFDLYLMFVMLMGLGFTISNGYKFYVGGKDGWVPTPSEDYSHWSHRNRFQVNDTLHFKYAKGKDSVLEVTEQ  
EYNTCNTTHTPLTSLSDGDSLFLLSHSGSYFFISGNSQNCLKGQKLAVKVLSTVHSHSPRHTSPSPSPVHQELSSPG  
PSPGVEPSSDSNSRVPAPGPATAPNSAGLVGPGMVVLVIMISSLF

>At4g30590-PAG12 68417.m04340 plastocyanin-like domain-containing protein  
MGIIVPVLTFLVLLFAKVSHGASNPRVILVGGSVGSWKVPDSPNNTLNHWAENNRFKVGDIVWKYDMKVDSVLQVT  
KEDYESCNTANPLKQYNDGNTKVALDKSGPYFFISGAPGNCAKGEKITLVVLAERKSGGGSSSGDAPKVPSPVSPTAQ  
TPAPAPGPAAAHNAAVGLKVASGWFLTAVVVGLAMA

>At4g31840-PAG13 68417.m04524 plastocyanin-like domain-containing protein  
MASSLLVTIFLCISVFFFSSVNA NEVTVGGKSGDWKIPSSSFSFNEWAQKARFKVGDIVFKYEAGKDSVLQVTR  
EAYEKCNTTSPKASYTDGNTKVKLDQAGPVYFVSGTEGHCQKQKLRLLVITPRNSAFSPGSPSEFDGPAVAPTSG  
AAKLAGGFSVVFGLVLGLWAFFF

>At4g32490-PAG14 68417.m04625 plastocyanin-like domain-containing protein  
MVFVKMTDVYLMIVMLMGLGFSIELSNHGKFYVGGRDGWVLTPTSEDYSHWSHRNRFQVNDTLFYKYVKGKDSVLEVS  
EKEYNTCNTTHTPLTSLSDGDSLFLLSRSDPFFVSGNSGSLKGQKLAVTVMSTGHSHTPRHSPSPSPSASPVRK  
ALLSPAPIPVHKALSSPAPTGVDPHSEVLAPAPGPAAAVRNLAGSVAPGVISLGLVLVIMISSMV

>At5g25090-PAG15 68418.m02973 plastocyanin-like domain-containing protein  
MAQRTLVAFFLIFLLTNLVCSKEIIVGGKTSSWKIPSSPSESLNKWAE SLRFRVGD TLVWKYDEEKDSVLQVTKD  
AYINCNTTNPAAANYSGDTKVKLERSGPYFFISGSKSNCVEGEKLIHIVMSSRGGHTGGFFTSSPSPAPSPALLGA  
PTVAPASGGSASSLTRQVGLGVGLLAIVLL

>At5g26330-PAG16 68418.m03147 plastocyanin-like domain-containing protein /  
mavicyanin, putative similar to mavicyanin SP:P80728 from [Cucurbita pepo]  
MAAIIVAALACIVVMLRLSEAAVYKVGDSAGWTTIANVDYKLWASTKTFHIGDVLFEYNPQFHNVMRVTHPMYRSC  
NTSKPISTFTTGNDISITLNTNHGHHFFFCGVPVGHCLAGQKLDLHVLLPASSTPLSDPPTSSSSSPSTTIIPAGVPGP  
SPSLAASLPSMVTAQIVAVVTLVSLAFTNFAS

>At5g53870-PAG17 68418.m06701 plastocyanin-like domain-containing protein  
contains similarity to SP|Q02917 Early nodulin 55-2 precursor {Glycine max};  
PF02298: Plastocyanin-like domain  
MSAIMKSLCFSFLILASFATFFSVADAWRFNVGGNGAWVTNPQENYNTWAERNRFQVNDLSLYFKYAKGSDSVQQVMK  
ADFDGCNVRNPIKFNENGESVVTLDKRGAFYFISGNQDHCQKQKLI VVVLA VRNQPSAPAHSPVPSVSPPTQPPKSH  
SPVSPVAPASAPSKSQPPRSSVSPAQPPKSSSPISHTPALSPSHATSHSPATPSPSPKSPSPVSHSPHSPHTPSH  
SPAHTPSHSPAHAPSHSPAHAHSPAHAPSHSPAHSHPATPKSPSPSSSPAQSPATPSPMTPQSPSPVSSPSP  
DQSAAPSDQSTPLASPSETTPTADNITAPAPSPRTNSASGLAVTSVMSTLFSATFTFLMFA

>At1g03820-AGP28I 68414.m00363 expressed protein similar to arabinogalactan-  
protein; AGP (GI:1087015) {Pyrus communis}; similar to Protein E6.  
(SP:Q01197) {Gossypium hirsutum}

MASFALKPIFCFIAVFCFIVHNVEA REGKLFSSKFTTHIDRPNNKDVALSPAPAPGLAQANGRLGNGSFGPGSGMIPO  
TKESWPPSSSTTTDEEFELKMATFDEEKNTKLPEAFEEEESESDLNPKDKYNNNNNNNGYTYTTNNYNDNGRGY  
GNEEEKQGMSDTRVMENGYFYDTRGRNSENTPSRGYENARGNDHTNEFETMEEYYKSLEGSQEEYEP

>At1g28290-AGP31I 68414.m03472 pollen Ole e 1 allergen and extensin family protein similar to arabinogalactan protein [Daucus carota] GI:11322245; contains Pfam profile PF01190: Pollen proteins Ole e I family

MGFIGKSVLVSVALWCFTSSVFT EEVNHTQTPSLAPAPAPYHHGHHHPHPHHHPHPHPHPHPHPAKSPVKPPVK  
APVSPPAKPPVKPPVYPPTKAPVKPPTKPPVKPPVSPPAKPPVKPPVYPPTKAPVKPPTKPPVKPPVYPPTKAPVKP  
PTKPPVKPPVYPPTKAPVKPPTKPPVKPPVSPPAKPPVKPPVYPPTKAPVKPPVSPPPTKPPVTPVYPPKFNRLVA  
VRGTVYCKSCKYAAFNTLLGAKPIEGATVKLVCKSKKNITAETTTDKNGYFLLLAPKTVTNTFGFRGRCRVYLVKSKDY  
KCSKVSCLFGGDVGAELKPEKLGKSTVVVNVKLVYGLFVNGPFAFNPSCP

>At1g36150-AGP29I 68414.m04494 protease inhibitor/seed storage/lipid transfer protein (LTP) family protein low similarity to glucoamylase S1/S2 [Precursor] from Saccharomyces cerevisiae [SP|P08640], proteophosphoglycan from Leishmania major [GI:5420387]; contains Pfam protease inhibitor/seed storage/LTP family domain PF00234

MKPSFVLLSIVLLSSLSDA ADFGSPSQPPSMAPTQPSNSTDCSSVIYSMDCLSFLTVMGSTDPSPTKTCCVGVK  
TVLNYSKCLCSALESSREMGFVLDLTKALAMPKICNPIDPNCVSTPAASTPVSPPVESPTTSPSSAKSPAITPS  
SPAVSHSPPVVRHSSPPVSHSSPPVSHSSPPTSRS SPAVSHSSPVVAASSPVKAVSSSTASSPRAASPSPSPSIS  
SSGILLVSKLFIAVVMVSSFLYILA

>At2g33790-AGP30I 68415.m04144 pollen Ole e 1 allergen and extensin family protein similar to arabinogalactan protein [Daucus carota] GI:11322245, SP|Q03211 Pistil-specific extensin-like protein precursor (PELP) {Nicotiana tabacum}; contains Pfam profile PF01190: Pollen proteins Ole e I family

MGIIGKSVSLTLFALLCFTSSVFT LGVNQPGSSDPFHSLPQHLPLPPIKLPPLPAKAPIKLPAYPKAPIKLPTL  
PPAKAPIKLPTLPPPIKPPVLPVYPPKYNKTLVAVRGGVYCKACKYAGVNNVQGAQKPVKDAVVRLVCKNKNKNSISET  
KTDKNGYFMLLAPKTVTNYDIKGCRAFLVKS PDKTKCSKVSLLHDGGKGSVLKPVLPKPGFSSTIMRWFKYSVYNVGGP  
AFEPTCPK

>At5g21160-AGP32I 68418.m02528 La domain-containing protein / proline-rich family protein contains proline-rich extensin domains, INTERPRO:IPR002965, PF05383: La domain

MMAETEGSVADDRELITREGGIGTKSPWKTTTSPVETIDAPVMGAHSWPALADAAQQPRPKNPAPAPAPPSKNIPT  
SIPITPAVGTQAKSKGGKANPGHKNPSGRHSGKPGPRSNQNGPPPPYLVHAVPYHPPPPPMVPLPHAAGPDFPY  
APYPPYPVPPVPTESGNEKQVQASPLPPVL PAPQGDGPKPWP HQRFDPNMPQAGPRNFRPFPMPGAPGFLVG  
PGPGFPGPVYLLPGPPGAIRGPYPPRFAPYPVNQGPPI LSP EKL DLRDRVLKQVEYYFSDENLENDHYLISLMDEE  
GWVPTKIIAGFKRVKAMTMDVDFIVYALGFSNSVEVQGDQIRKRDKWSDWI PA SKKSTSAETIGDGDKDSPKSITSG  
DNFGNPSKGSKPTVSDFSSEGAQSSRTNNYKSGNLKSSADEKRNVEDLSNDFSNTFLLDEELDLEHRS PRKSGLSM  
SKSIEYEDDDMAVDDQDIQKLVIVTQNSGKSDGAGIGGTEAKNIPKELASTINDGLYYFEQELKKKRSGRKNNSHL  
DTKDGKIKSGEGLNTKLGENSAANDGEEHGIITSRRKQNKGTGTHKHTAHARRFFSSNIRNNGNISESPSSSIGFF  
FGSTPDSHGPRLSKLSSSPQCTLSGSSPPVGSPLKSFPPFQHPSHQLLEENGFKQEKYLKRYKRLNERKKGSGC  
SEEMNHLYRFWSYFLRDTFVLSMYDDFQKFALEDAAGNYDYGLECLFRFYSGLEKHFDELDYKDFEKLSDLDFYHKG  
NLYGLEKYWAFHHYRGKEEPI TKHPELEKLLKEEFRSIDD FRAKETITNQKENKSH

>At5g56330-AGP33I 68418.m07031 carbonic anhydrase family protein contains proline-rich extensin domains, INTERPRO:IPR002965; contains Pfam profile PF00194: Eukaryotic-type carbonic anhydrase

MKISSLGWVVLVLFISITIVSSAPAPKPPKPKPAPAPT PPKPKP TPAPT PPKPKP PAPTPPKPKPAPAPT PPKPKP  
APAPT PPKPKPAPTPPNPKP TPAPT PPKPKPAPAPAPT PPKPKPAPKPKPAPGGEVEDETEFSYETKGNKGP AKWG  
TLDAEWMCMGIGKMQSPIDLRDKNVVVSNKFGLLRSQYLP SNTTIKNRGHDIMLKFKGGNKGIGVTIRGTRYQLQQL  
HWHSPSEHTINGKRFAL EHLVHESKDKRYAVVAFLYNLGASDPFLFSLEKQLKKITDTHASEEHIRTVSSKQVKLL  
RVAVHDASDSNARPLQAVNKRKVYLYKPKVKLMKKYCNISY
