# Supplementary material
Source: PubMed Central journal article supplement (PMC2879790)
Supplement: pp.110.156554_3.pdf [file pp.110.156554_3.pdf]

**Supplemental Figure 11.** Protein sequences encoded by the predicted PRP genes. Colored sequences at the N and C terminus indicate predicted signal peptide (green) and GPI anchor (turquoise) addition sequences if present. PPVX(K/T) (grey), KKPCPP (teal), and PPV (pink) repeats are also indicated.

>At1g15825-PRP5 68414.m01899 hydroxyproline-rich glycoprotein family protein contains proline-rich extensin domains, INTERPRO:IPR002965  
MPPPVQDFPPIILTPAEFFPILP **PPVQEIPPVFTL**PPTVQDPPTIPVFST **PPV**LGDFPPQTPDFTTPEVTNPWQ**P**  
**PV**TSFAPPIESIPTIPDNFPVTPNPDMGSNQPFVELPPPTWDSPPFN**R**

>At1g54970-PRP1 68414.m06278 proline-rich family protein similar to proline-rich protein GI:170048 from [Glycine max]  
**MAITRASFAICILLSLATIATA**DYYAPSSPPVYTSVFNKPTLPPVYTPPVHKPTLP **PPVYTPPVHKPTLS**PPVYTKPTLPPAYT **PPVY**NKPTLPAPVYTPPVYKPTLS **PPVYTKPTLL**PPVFKPTLSPPVYTKPTLSPTVYKPTLS **PPV**NNK  
PSLS **PPVYKPTLS**PPVYTKPTLP **PPVY**KKSPSYSPPPFAPKPTYTPPTKPYVPEIIKAVGGIILCKNGYETYPIQG  
AKAKIVCSERGSYEKSKNEVVIYSDPTDFKGYFHVVLTHIKNLSNCRVKLYTSPVETCKNPTNVNKGLTGVPFSMYS  
DKNLKLFNVGPFYFTAGSKAAPATPRY

>At2g21140-PRP2 68415.m02508 hydroxyproline-rich glycoprotein family protein identical to proline-rich protein 2 [Arabidopsis thaliana]  
gi|7620011|gb|AAF64549  
**MRILPKSGGALCLLFVFCVVAHS**LSCDVKVVGDVEVIGYSEISKIKIPNAFSGLRVTIECKAADSCKGHFVTRGS  
GEVDETGFHLNIPHDIVGDDGTLKEACYAHLQSAFGNCPAHDGLEASKIVFLSKSGQNHVLGLKSLKFSPEVCI  
SKFFWHMPKFPLPPPLNPLPLTFPKI **KKPCPP**IYK **PPV**VIP **KKPCPP**KIAHKPIYK **PPV**PIYK **PPV**PIYK **PPV**VIP **KPCPP**KIHKPIYK **PPV**PIYK **PPV**VIPKKTFFPLHKPIYKHPVPIYKPIFK **PPV**VVIP **KKPCPP**LPKFPHFPKYIPH  
PKFGKWPPFSPH

>At2g27380-PRP6 68415.m03302 proline-rich family protein contains proline-rich extensin domains, INTERPRO:IPR002965  
**MRVPLIDFLRFLVLILSLSGASVA**ADATVKQNFNKYETDSGHAHPPPIYGAPPSYTTPPPPIYSPPIYPPPIQKPPT  
YSPPIYPPPIQKPPTPTYSPPPIYPPPIQKPPTPTYSPPPIYPPPIQKPPTPTYSPPPIYPPPIQKPPTPSYS **PPVKPP**  
**VQMPPTPTYS**SPPIKPPPVHKPPTPTYSPPPIKPPVHKPPTPIYSPPIKPPVHKPPTPIYSPPIKPPPVHKPPTPTYS  
**PPVKPP** **PPV**HKPPTPIYSPPIKPPPVHKPPTPIYS **PPVKPPVQTPPTPIYS** **PPV**KPPVHKPPTPTYS **PPV**KSPPVQ  
KPPTPTYSPPPIKPPVQKPPTPTYSPPPIKPPV **PPV**KPPTPIYS **PPV**KPPVHKPPTPIYS **PPV**KPPVHKPPTPIYS **PP**  
**VKPPPIQKPPTPTYS**SPPIKPPPLQKPPTPTYSPPIKL **PPV**KPPTPIYS **PPV**KPPVHKPPTPIYS **PPV**KPPVHKP  
TPTYSPPIKP **PPV**KPPTPTYS **PPV**QPPVQKPPTPTYS **PPV**KPPPIQKPPTPTYSPPIKP **PPV**KPPTPTYSPPIKP  
**PV**HKPPTPTYSPPIKPPPIHKPPTPTYSPPIKPPVHKPPTPTYSPPIKPPVHKPPTPTYSPPIKPPVHKPPTPT  
YSPPIKPPVHKPPTPTYSPPIKPPVHKPPTPTYSPPIKP **PPV**QKPPTPTYS **PPV**KP **PPV**QLPPTPTYS **PPV**KPP  
**VQVPPTPTYS** **PPV**KPPV **PPV**QVPPTPTYSPPIKP **PPV**QVPPTPTTPSPQGGYGTPPPYAYLSHPIDIRN

>At2g47530-PRP7 68415.m05932 hypothetical protein  
**MASTGAATNLLLLAMVVVVATA**DYYAQPQYVPKPTTTYTSVVKTYLPSKSNPDIAIEGFILCKSGYKTYPIQGGKV  
KVVCVVVDSYGLVAKVTISSYPTDLKGYFYFITYGLSHKVNNISSCKVKLESSPVFTCKTPTNVNKGVTGAPLSPD  
NSKFLSHDNLTLTYLEPFYFSSPVAPKPVY

>At3g50570-PRP8 68416.m05531 hydroxyproline-rich glycoprotein family protein contains proline-rich protein domains, INTERPRO:IPR000694  
**MKSVIVIVALLCLVSLNPTVG**STKKPWPKPSDLANHNNNFSGSKVWACSSSDPNTPPSPGSPFNIPQIPGIPN  
IPFPNIPGIPNIPGLPNIPGLPGPPFESLLVSQSGELEKCLSKDGSKTNEKCFSQIFSSWAENDFALDKECEII  
VNMNKRICYGHLHMMFKSHFFAPLLQYSCHIKHAKN

>At3g62680-PRP3 68416.m07041 proline-rich family protein contains proline-rich region, INTERPRO:IPR000694  
**MAITRSSLAICLILSLVTITTA**DYSSPSSPPVYKSPEHKPTLSPVYTPPVYKPTLS **PPVYTKPTI**PPPVYTPPVYK  
HTPSPPVYTKPTI **PPVYTKPTI**PPPVYTPPVYKPTLSPVYTKPTI **PPVYTKPTI**PPPVYTPPVYKPTLSPVYTKPTI **PPVYTKPTI**PPPVYTPPVYKPTLSPVY  
**KK**SPSYSSPPPVYKPTYTPTTKPYVPEILKAVDGIILCKNGYETYPILGAKIQIVCSDPASYGKSNTEVVIYSNP
